# Supplementary material for: Forest Fire Effects on Landscape Snow Albedo Recovery and Decay
Source: MDPI journal article supplement (doi:10.3390/rs14164079), 2022-08-20
Supplement: s1 [file s1]

## Supplemental materials

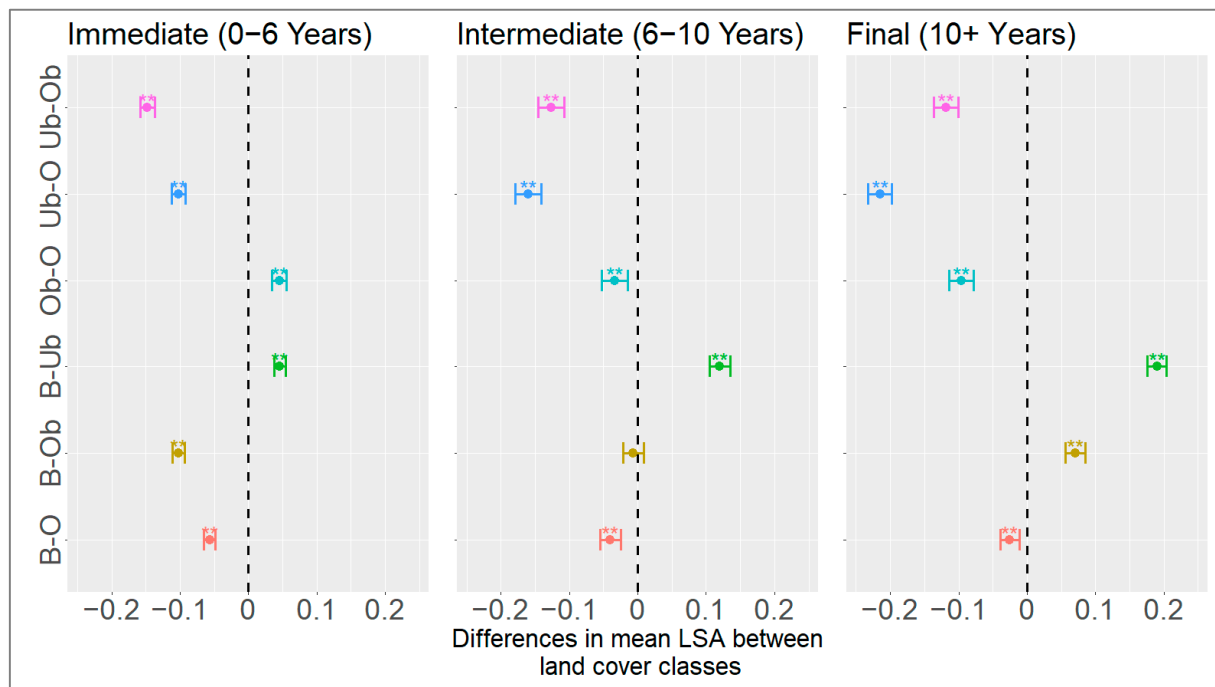

**Figure S1.** Tukey plot shows significance in pairwise differences in mean landscape snow albedo data between burned forest including high, moderate, low burn severity classifications relative to open meadow in the burned regions and forest and open meadow in the buffer outside the burned regions. All burn types were combined into a single “B” group. Open areas within the burn are titled “O”. Unburned buffer forest and buffer open areas outside the burn are titled “Ub” and “Ob”, respectively.
